# Supplementary material for: Highly selective plasma-activated copper catalysts for carbon dioxide reduction to ethylene
Source: PubMed Central journal article supplement (PMC4931497; doi:10.1038/ncomms12123), 2016-06-30
Supplement: ncomms12123-s1.pdf [file ncomms12123-s1.pdf]

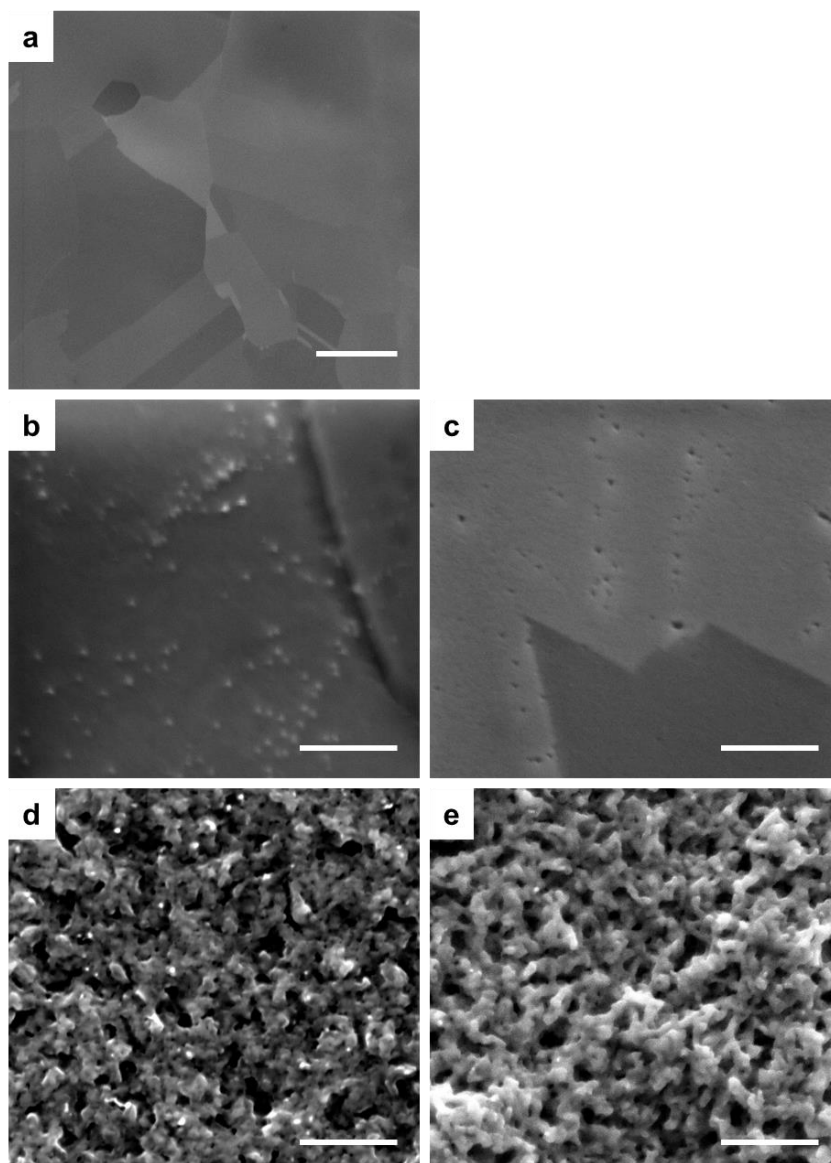

**Supplementary Figure 1.** a) SEM image of Cu foil after electropolishing (5  $\mu\text{m}$  scale bar). SEM images of Cu foils treated with  $\text{H}_2$  plasma at 100W for 2 minutes b) as prepared and c) after subsequent  $\text{CO}_2$  electroreduction, and Cu foils treated with  $\text{O}_2$  plasma at 100W for 2 minutes plus  $\text{H}_2$  plasma at 100W for 10 minutes d) as prepared and e) after  $\text{CO}_2$  electroreduction (1  $\mu\text{m}$  scale bars). c) and e) are shown after  $\text{CO}_2$  electroreduction at -0.9V vs. RHE for 1 hour in 0.1 M  $\text{KHCO}_3$ .

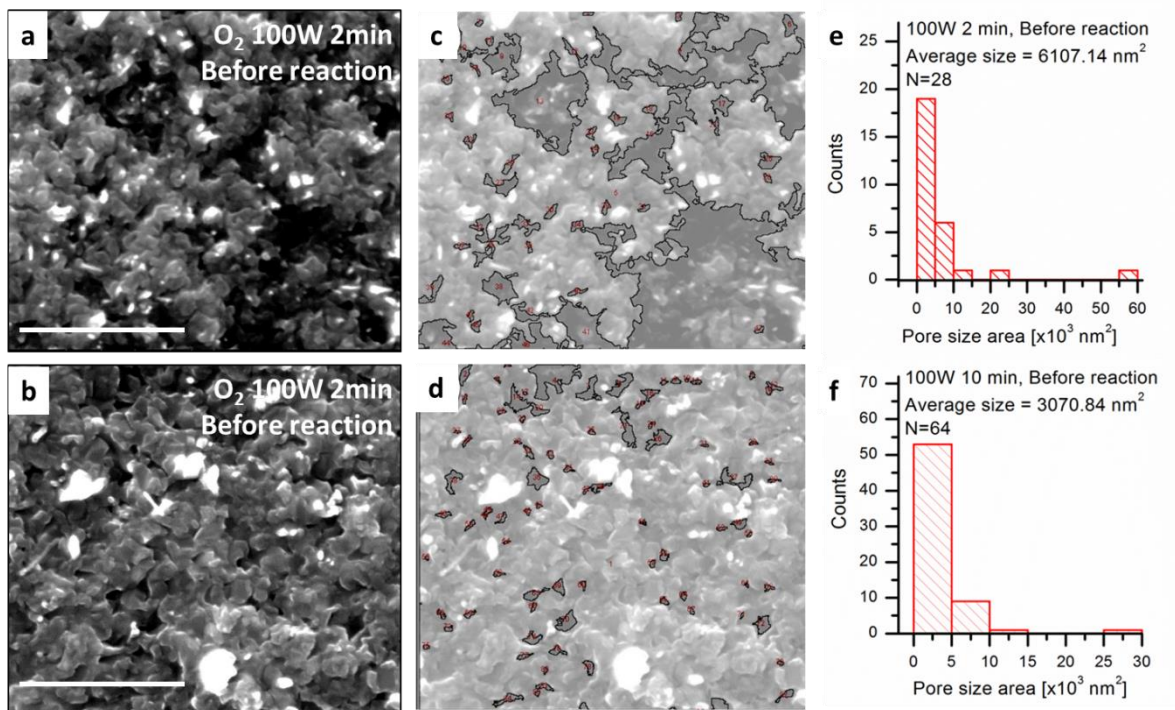

**Supplementary Figure 2.** Quantification of observed pores from the SEM images of the O<sub>2</sub> plasma treated samples at 100W for 2 min (a) and 100W for 10 min (b) before reaction (1  $\mu\text{m}$  scale bars). By inspection, no visible pores were observed for the 20W for 2 min sample thus the number of pores (N) and average size were considered as 0. Image analysis was performed using ImageJ, where pores were measured manually by selecting the pores and automatically using the software. (c) and (d) show the outlined pores marked in red resulting from the automatic image analysis. Areas that do not outline a pore on the SEM were disregarded from the analysis. (e) and (f) show the resulting size distribution indicating increased porosity with plasma power and time based on the increased number of pores detected (N = 28 to 64) and decreased average pore size (6107.14 nm<sup>2</sup> to 3070.84 nm<sup>2</sup>).

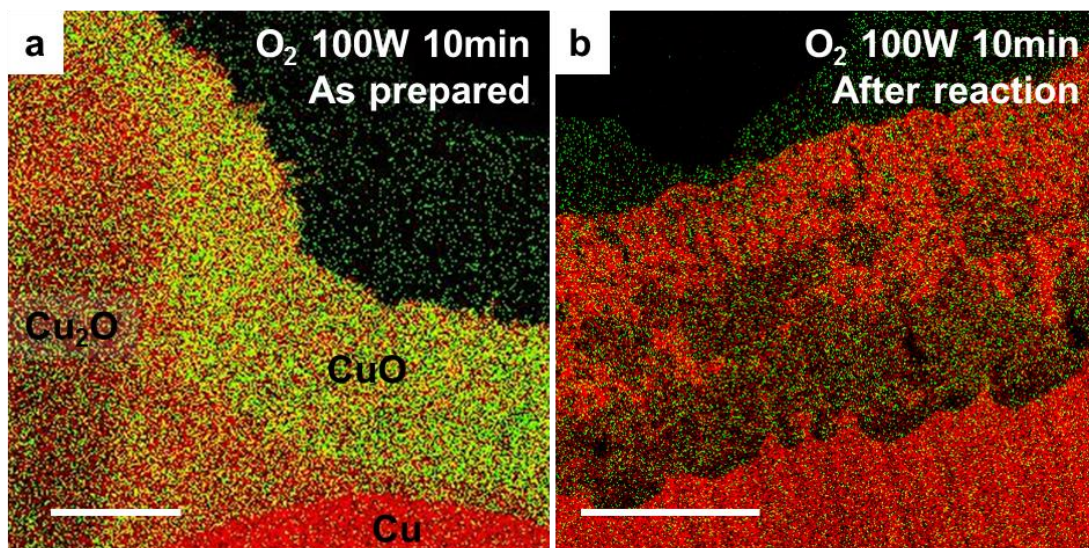

**Supplementary Figure 3.** EDS elemental maps of Cu foils treated with O<sub>2</sub> plasma for 100W 10 minutes a) before the reaction and b) after CO<sub>2</sub>RR for 1 hour at -0.91 V vs. RHE (500 nm scale bars).

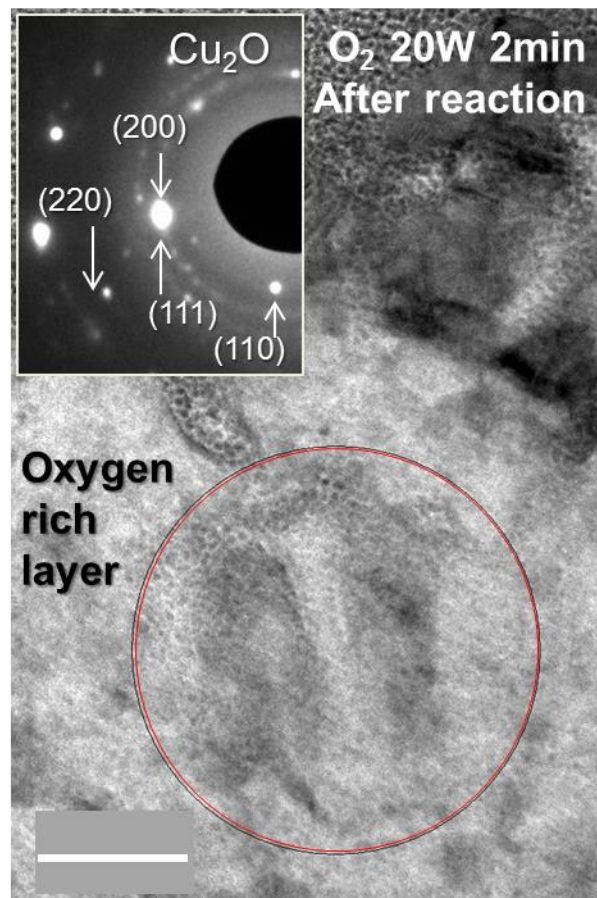

**Supplementary Figure 4.** HRTEM and selected area electron diffraction (SAED) analysis of the  $\text{O}_2$  plasma 20W 2 minutes treated sample after the reaction (50 nm scale bar).

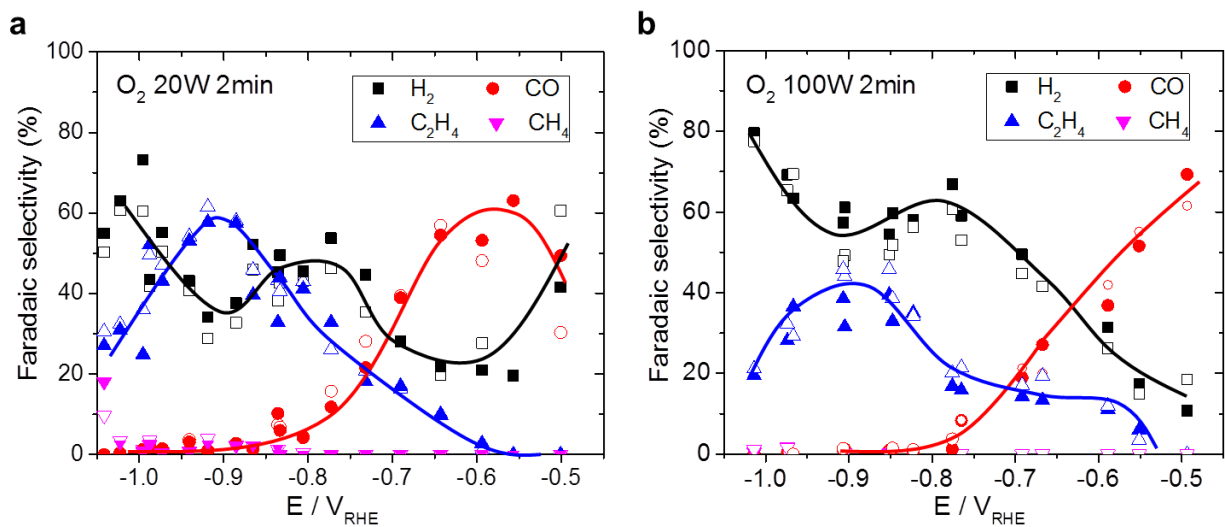

**Supplementary Figure 5.** Stationary Faradaic selectivity towards gas products after 10 minutes (closed symbols) and 60 minutes (open symbols) for a)  $O_2$  20W 2 minutes and b)  $O_2$  100W 2 minutes treated samples. Data were acquired by GC analysis of the gas phase during  $CO_2$  electrolysis at a constant potential in  $CO_2$  saturated 0.1 M  $KHCO_3$ .

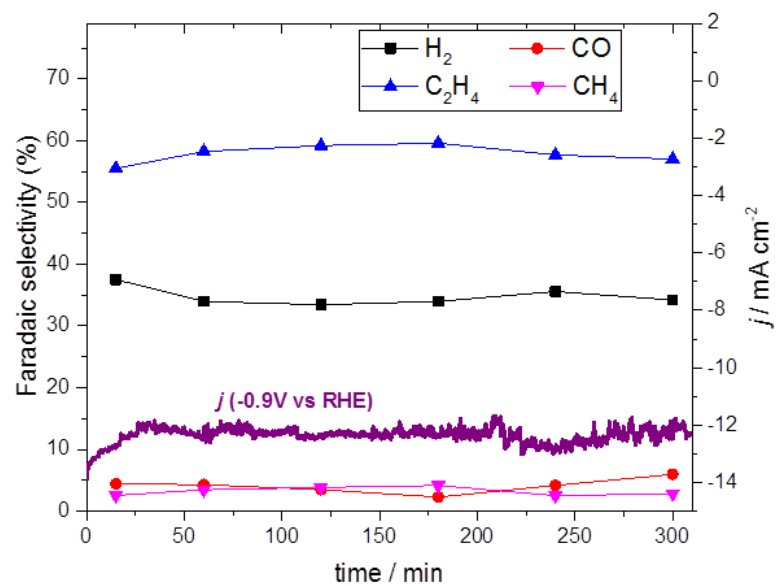

**Supplementary Figure 6.** Stationary current density and Faradaic selectivities of the main products of the CO<sub>2</sub> reduction reaction on O<sub>2</sub> 20W 2 min plasma treated Cu foil at -0.9 V vs. RHE as a function of time.

**Supplementary Figure 7.** Double-layer capacitance current on the plasma treated Cu foils determined by cyclic voltammetry between 0.02 V and 0.25 V vs RHE in CO<sub>2</sub> saturated 0.1 M KHCO<sub>3</sub> as a function of scan rate.

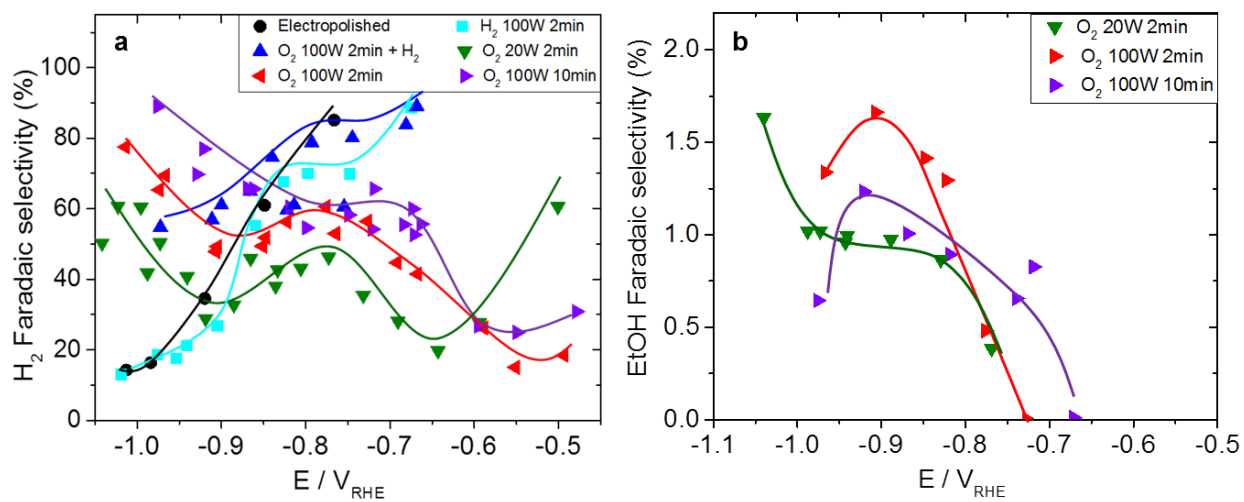

**Supplementary Figure 8.** Faradaic selectivity towards a) H<sub>2</sub> and b) ethanol as a function of electrode potentials after 60 minutes of bulk CO<sub>2</sub> electrolysis at a constant potential, in CO<sub>2</sub> saturated 0.1 M KHCO<sub>3</sub>.



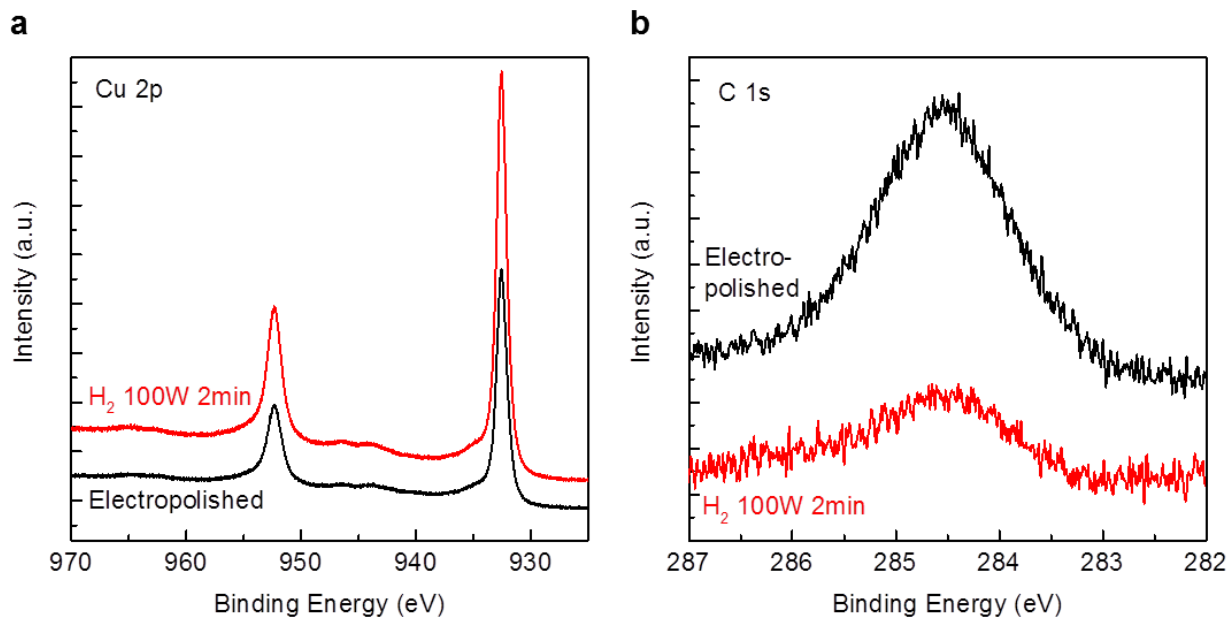

**Supplementary Figure 9.** XPS measurement of a) the Cu 2p and b) the C 1s regions of the electro-polished Cu foil and the foil after H<sub>2</sub> plasma treatment at 100W for 2 minutes after *ex situ* transfer in air to our UHV XPS system.

**Supplementary Table 1.** Quantification of the TEM-EDS spectra acquired from the different areas of the Cu foil samples after plasma treatment/as prepared and after reactions.

| <b>Sample</b>                                                | <b>Area</b> | <b>Cu atomic %</b> | <b>O atomic %</b> | <b>Cu:O ratio</b> |
|--------------------------------------------------------------|-------------|--------------------|-------------------|-------------------|
| O <sub>2</sub> 20W 2 min<br>As prepared                      | Upper layer | 55.6 ± 5.1         | 44.4 ± 4.2        | 1.3:1             |
|                                                              | Interlayer  | 73.0 ± 6.7         | 27.0 ± 2.7        | 2.7:1             |
| O <sub>2</sub> 20W 2 min<br>After reaction                   | Cu rich     | 96.3 ± 8.9         | 3.4 ± 0.9         | 26.1:1            |
|                                                              | Pores       | 80.4 ± 7.67        | 19.5 ± 2.6        | 4.1:1             |
| O <sub>2</sub> 100W 2 min<br>As prepared                     | Upper layer | 57.0 ± 5.2         | 43.0 ± 4.1        | 1.3:1             |
|                                                              | Interlayer  | 73.4 ± 6.7         | 26.6 ± 2.7        | 2.8:1             |
| O <sub>2</sub> 100W 2 min<br>After reaction                  | Cu rich     | 78.5 ± 7.1         | 21.5 ± 2.2        | 3.7:1             |
|                                                              | Pores       | 70.5 ± 6.6         | 29.5 ± 3.3        | 2.4:1             |
| O <sub>2</sub> 100W 2 min + H <sub>2</sub><br>As prepared    | Top surface | 92.5 ± 8.5         | 7.5 ± 1.1         | 12.3:1            |
|                                                              | Upper layer | 56.3 ± 5.1         | 43.8 ± 4.2        | 1.3:1             |
|                                                              | Interlayer  | 72.4 ± 6.6         | 27.6 ± 2.8        | 2.6:1             |
| O <sub>2</sub> 100W 2 min + H <sub>2</sub><br>After reaction | Cu rich     | 90.7 ± 8.3         | 9.3 ± 1.3         | 9.8:1             |
|                                                              | Pores       | 74.8 ± 6.8         | 25.2 ± 2.6        | 2.9:1             |
| O <sub>2</sub> 100W 10 min<br>As prepared                    | Upper layer | 57.0 ± 5.2         | 43.0 ± 4.1        | 1.3:1             |
|                                                              | Interlayer  | 73.8 ± 6.8         | 26.2 ± 2.9        | 2.8:1             |
| O <sub>2</sub> 100W 10 min<br>After reaction                 | Cu rich     | 90.7 ± 8.2         | 9.3 ± 1.2         | 9.7:1             |
|                                                              | Pores       | 80.3 ± 7.4         | 19.7 ± 2.2        | 4.1:1             |

**Supplementary Table 2.** EXAFS fit parameters for Cu foil treated with 100W 2min O<sub>2</sub> plasma. Data were measured *operando* during CO<sub>2</sub> electroreduction at -1.2 V vs. RHE in 0.1 M KHCO<sub>3</sub>. Parentheses indicate error on last digit. Before fitting, data were corrected for self-absorption.

| Sample              | Path                      | N        | r (Å)    | $\sigma^2$ (Å <sup>2</sup> ) |
|---------------------|---------------------------|----------|----------|------------------------------|
| As prepared         | Cu-Cu (Cu <sup>0</sup> )  | 1.4 (3)  | 2.57 (1) | 0.004 (2)                    |
|                     | Cu-O (Cu <sub>2</sub> O)  | 1.2 (2)  | 1.89 (1) | 0.004 (2)                    |
|                     | Cu-Cu (Cu <sub>2</sub> O) | 11 (3)   | 3.11 (2) | 0.029 (4)                    |
| 15 minutes reaction | Cu-Cu (Cu <sup>0</sup> )  | 6 (2)    | 2.54 (2) | 0.004 (2)                    |
|                     | Cu-O (Cu <sub>2</sub> O)  | 0.9 (7)  | 1.87 (6) | 0.000 (9)                    |
| 1 hour reaction     | Cu-Cu (Cu <sup>0</sup> )  | 12 (set) | 2.53 (1) | 0.0066 (7)                   |

**Supplementary Table 3.** Double-layer capacitance and roughness factors for Cu foils after plasma treatments, following the method from Li et al.<sup>1</sup> Double layer capacitance was estimated as the slope obtained in Supplementary Figure 5. The surface roughness factor for electropolished Cu was defined to be 1, and it was used to determine the roughness for the other foils as follows:

$$\text{Roughness factor} = \frac{\text{Capacitance}}{0.0474} \quad (1)$$

| <b>Sample</b>                              | <b>Capacitance<br/>mF</b> | <b>Roughness<br/>Factor</b> |
|--------------------------------------------|---------------------------|-----------------------------|
| Electropolished                            | 0.0474                    | 1.0                         |
| H <sub>2</sub> 100W 2min                   | 0.0705                    | 1.5                         |
| O <sub>2</sub> 20 W 2min                   | 1.25                      | 26.4                        |
| O <sub>2</sub> 100 W 2min                  | 2.07                      | 43.7                        |
| O <sub>2</sub> 100 W 2min + H <sub>2</sub> | 2.29                      | 48.3                        |
| O <sub>2</sub> 100 W 10min                 | 4.25                      | 89.7                        |

## Supplementary References

- 1 Li, C. W. & Kanan, M. W. CO<sub>2</sub> reduction at low overpotential on Cu electrodes resulting from the reduction of thick Cu<sub>2</sub>O films. *J. Am. Chem. Soc.* **134**, 7231-7234 (2012).
